# Supplementary material for: Effects of oral hygiene management containing Cibotium Barometz J. Smith extract on peri-implant mucositis: a randomized clinical trial
Source: Springer Nature journal article supplement (doi:10.1186/s12906-025-04900-3), 2025-05-06
Supplement: MOESM1 [file 12906_2025_4900_MOESM1_ESM.pdf]

### <Oral Examination>

| ID |  | Age |  | sex | M/F |
|----|--|-----|--|-----|-----|
|----|--|-----|--|-----|-----|

## &lt;Base&gt;

[illegible]

|       |       |      |      |       |       |      |      |                                     |
|-------|-------|------|------|-------|-------|------|------|-------------------------------------|
| PI    | Right | Ant. | Left | GI    | Right | Ant. | Left | BB checker<br>1st:<br>post:<br>3rd: |
| Upper |       |      |      | Upper |       |      |      |                                     |
| Lower |       |      |      | Lower |       |      |      |                                     |

## &lt;Post of saline&gt;

[illegible]

|       |       |      |      |       |       |      |      |                                   |
|-------|-------|------|------|-------|-------|------|------|-----------------------------------|
| PI    | Right | Ant. | Left | GI    | Right | Ant. | Left | Cariview<br>1st:<br>post:<br>3rd: |
| Upper |       |      |      | Upper |       |      |      |                                   |
| Lower |       |      |      | Lower |       |      |      |                                   |

<Post of G

[illegible]

|       |       |      |      |       |       |      |      |  |
|-------|-------|------|------|-------|-------|------|------|--|
| PI    | Right | Ant. | Left | GI    | Right | Ant. | Left |  |
| Upper |       |      |      | Upper |       |      |      |  |
| Lower |       |      |      | Lower |       |      |      |  |

<Post of 5days>

[illegible]

|       |       |      |      |       |       |      |      |  |
|-------|-------|------|------|-------|-------|------|------|--|
| PI    | Right | Ant. | Left | GI    | Right | Ant. | Left |  |
| Upper |       |      |      | Upper |       |      |      |  |
| Lower |       |      |      | Lower |       |      |      |  |

## Changes in oral environment according to the antibacterial effect of natural detergent extract

This is a question about demographic characteristics

|                     |                                                                                    |
|---------------------|------------------------------------------------------------------------------------|
| 1. Gender           | ① Male          ② Female                                                           |
| 2. Age              | (        ) years                                                                   |
| 3. Systemic disease | ① No disease   ② High blood pressure   ③ diabetes   ④ Etc (                      ) |
| 4. Marriage         | ① Single   ② Married   ③ Etc (                      )                              |

This is a question about oral health behavior.

1. How many times a day do you brush your teeth?

① Rarely (once every 2-3 days)    ② 1    ③ 2    ④ 3    ⑤ 4+

---

2. When do you usually brush your teeth (check all that apply)

|                                                                  | Do | Don't |
|------------------------------------------------------------------|----|-------|
| 1) Immediately after waking up in the morning (before breakfast) | ①  | ②     |
| 2) After breakfast                                               | ①  | ②     |
| 3) After lunch                                                   | ①  | ②     |
| 4) After dinner                                                  | ①  | ②     |
| 5) Before sleeping                                               | ①  | ②     |

This is a question about oral health.

Please circle (v) the question that you think is closest to how you felt in the past two months.

| Questionnaire                                                                                               | At all no | No | Usually | Well | Very well |
|-------------------------------------------------------------------------------------------------------------|-----------|----|---------|------|-----------|
| I feel that my overall oral health is healthy.                                                              |           |    |         |      |           |
| There have been times when it was difficult for me to chew food because of problems with my teeth or mouth. |           |    |         |      |           |
| I have had swollen or bleeding gums.                                                                        |           |    |         |      |           |
| Your gums bleed when you brush your teeth.                                                                  |           |    |         |      |           |
| I can't eat cold or hot food properly.                                                                      |           |    |         |      |           |
| You feel your mouth often dry (dry mouth).                                                                  |           |    |         |      |           |
| I feel bad breath (bad breath)                                                                              |           |    |         |      |           |
| I feel that my pronunciation is incorrect.                                                                  |           |    |         |      |           |
| There were times when there was a sound or pain in the jaw joint, or the mouth was not open well.           |           |    |         |      |           |
| I used to worry about my oral health.                                                                       |           |    |         |      |           |

This is a question about bad breath.

Questions about oral health Do you feel bad breath on your own?

① Yes ② No.

| No bad<br>breath (0) | Suspicious<br>Smell (1) | Slightly<br>bad breath(2) | Moderate bad<br>breath (3) | Strong<br>bad breath(4) | Serious<br>bad breath(5) |
|----------------------|-------------------------|---------------------------|----------------------------|-------------------------|--------------------------|
|                      |                         |                           |                            |                         |                          |

Do you feel that your bad breath has improved by participating in this study?

|                                                                                          |         |            |               |           |
|------------------------------------------------------------------------------------------|---------|------------|---------------|-----------|
| ① Yes ② No                                                                               |         |            |               |           |
| How do you feel about the improvement of bad breath through participation in this study? |         |            |               |           |
| Very good(5)                                                                             | Good(4) | Usually(3) | Not really(2) | at all(1) |
|                                                                                          |         |            |               |           |
